# Supplementary material
Source: publisher figshare collection journal article supplement (https://sage.figshare.com/ndownloader/files/34293816)
Supplement: Supplementary file 1 [file 34293816]

**Supplementary Material for “Considerations for Fitting Dynamic Bayesian Networks with Latent Variables: A Monte Carlo Study”**

Ray E. Reichenberg  
University of Nebraska - Lincoln

Roy Levy  
Arizona State University

Adam Clark  
University of Nebraska - Lincoln

### **Results of the Simulation Study**

Tables S1 – S10 contain the results of the parameter recovery simulation study for the raw bias, relative bias, and efficiency in the estimation of the transition probability and measurement model parameters as well as classification accuracy values for all models save for the L-CDM model. Table S11 presents the relative bias values for the L-DCM measurement model parameters. Additional tables, such as results for other parameters (i.e., the prior probability of mastery parameter) and/or for other indices (i.e., root mean squared error [RMSE]) are available upon request of the corresponding author (rreichenberg@unl.edu).

Table S1.

Raw bias in the estimation of the transition probability across manipulated design facets.

|                                    |                             | <u><i>MQ</i> = Low</u> |                |                 | <u><i>MQ</i> = Med</u> |                |                 |
|------------------------------------|-----------------------------|------------------------|----------------|-----------------|------------------------|----------------|-----------------|
|                                    |                             | <i>N</i> = 200         | <i>N</i> = 400 | <i>N</i> = 1000 | <i>N</i> = 200         | <i>N</i> = 400 | <i>N</i> = 1000 |
| <i>TP</i> = Low, <i>IP</i> = Low   | <i>J</i> = 1, <i>T</i> = 5  | .166                   | .129           | .102            | .008                   | .001           | .002            |
|                                    | <i>J</i> = 1, <i>T</i> = 10 | .047                   | .025           | .015            | .000                   | .001           | .003            |
|                                    | <i>J</i> = 3, <i>T</i> = 5  | .041                   | .023           | .015            | .001                   | .000           | .001            |
|                                    | <i>J</i> = 3, <i>T</i> = 10 | .005                   | .005           | .007            | .001                   | .001           | .001            |
|                                    | <i>J</i> = 5, <i>T</i> = 5  | .014                   | .008           | .005            | .000                   | .001           | .001            |
|                                    | <i>J</i> = 5, <i>T</i> = 10 | .004                   | .005           | .005            | .002                   | .000           | .001            |
| <i>TP</i> = High, <i>IP</i> = Low  | <i>J</i> = 1, <i>T</i> = 5  | .061                   | .045           | .037            | .000                   | .001           | -.001           |
|                                    | <i>J</i> = 1, <i>T</i> = 10 | .018                   | .007           | -.003           | -.003                  | -.001          | .000            |
|                                    | <i>J</i> = 3, <i>T</i> = 5  | .024                   | .011           | .004            | .002                   | .001           | .001            |
|                                    | <i>J</i> = 3, <i>T</i> = 10 | .000                   | .003           | -.003           | .002                   | .001           | .002            |
|                                    | <i>J</i> = 5, <i>T</i> = 5  | .011                   | .004           | .003            | .002                   | .001           | .001            |
|                                    | <i>J</i> = 5, <i>T</i> = 10 | -.003                  | .001           | .002            | .001                   | .001           | .001            |
| <i>TP</i> = Low, <i>IP</i> = High  | <i>J</i> = 1, <i>T</i> = 5  | .158                   | .118           | .080            | -.002                  | .000           | .002            |
|                                    | <i>J</i> = 1, <i>T</i> = 10 | .061                   | .028           | .018            | .000                   | .002           | .003            |
|                                    | <i>J</i> = 3, <i>T</i> = 5  | .027                   | .015           | .009            | -.001                  | .000           | .001            |
|                                    | <i>J</i> = 3, <i>T</i> = 10 | .004                   | .005           | .008            | .002                   | .001           | .000            |
|                                    | <i>J</i> = 5, <i>T</i> = 5  | .005                   | .004           | .005            | .002                   | .001           | .001            |
|                                    | <i>J</i> = 5, <i>T</i> = 10 | .003                   | .005           | .007            | .003                   | .000           | .000            |
| <i>TP</i> = High, <i>IP</i> = High | <i>J</i> = 1, <i>T</i> = 5  | .047                   | .049           | .029            | -.011                  | -.008          | -.002           |
|                                    | <i>J</i> = 1, <i>T</i> = 10 | .021                   | .005           | -.007           | -.010                  | -.004          | .000            |
|                                    | <i>J</i> = 3, <i>T</i> = 5  | .014                   | .007           | -.001           | -.001                  | .001           | .002            |
|                                    | <i>J</i> = 3, <i>T</i> = 10 | .003                   | -.008          | -.006           | -.001                  | -.001          | .001            |
|                                    | <i>J</i> = 5, <i>T</i> = 5  | -.002                  | -.002          | .003            | .001                   | .000           | .001            |
|                                    | <i>J</i> = 5, <i>T</i> = 10 | -.004                  | .000           | .005            | .002                   | .001           | .001            |

Table S2.

Relative bias in the estimation of the transition probability across manipulated design facets.

|                                    |                             | <u><i>MQ</i> = Low</u> |                |                 | <u><i>MQ</i> = Med</u> |                |                 |
|------------------------------------|-----------------------------|------------------------|----------------|-----------------|------------------------|----------------|-----------------|
|                                    |                             | <i>N</i> = 200         | <i>N</i> = 400 | <i>N</i> = 1000 | <i>N</i> = 200         | <i>N</i> = 400 | <i>N</i> = 1000 |
| <i>TP</i> = Low, <i>IP</i> = Low   | <i>J</i> = 1, <i>T</i> = 5  | 83.00%                 | 64.50%         | 51.00%          | 4.00%                  | 0.50%          | 1.00%           |
|                                    | <i>J</i> = 1, <i>T</i> = 10 | 23.50%                 | 12.50%         | 7.50%           | 0.00%                  | 0.50%          | 1.50%           |
|                                    | <i>J</i> = 3, <i>T</i> = 5  | 20.50%                 | 11.50%         | 7.50%           | 0.50%                  | 0.00%          | 0.50%           |
|                                    | <i>J</i> = 3, <i>T</i> = 10 | 2.50%                  | 2.50%          | 3.50%           | 0.50%                  | 0.50%          | 0.50%           |
|                                    | <i>J</i> = 5, <i>T</i> = 5  | 7.00%                  | 4.00%          | 2.50%           | 0.00%                  | 0.50%          | 0.50%           |
|                                    | <i>J</i> = 5, <i>T</i> = 10 | 2.00%                  | 2.50%          | 2.50%           | 1.00%                  | 0.00%          | 0.50%           |
| <i>TP</i> = High, <i>IP</i> = Low  | <i>J</i> = 1, <i>T</i> = 5  | 15.25%                 | 11.25%         | 9.25%           | 0.00%                  | 0.25%          | -0.25%          |
|                                    | <i>J</i> = 1, <i>T</i> = 10 | 4.50%                  | 1.75%          | -0.75%          | -0.75%                 | -0.25%         | 0.00%           |
|                                    | <i>J</i> = 3, <i>T</i> = 5  | 6.00%                  | 2.75%          | 1.00%           | 0.50%                  | 0.25%          | 0.25%           |
|                                    | <i>J</i> = 3, <i>T</i> = 10 | 0.00%                  | 0.75%          | -0.75%          | 0.50%                  | 0.25%          | 0.50%           |
|                                    | <i>J</i> = 5, <i>T</i> = 5  | 2.75%                  | 1.00%          | 0.75%           | 0.50%                  | 0.25%          | 0.25%           |
|                                    | <i>J</i> = 5, <i>T</i> = 10 | -0.75%                 | 0.25%          | 0.50%           | 0.25%                  | 0.25%          | 0.25%           |
| <i>TP</i> = Low, <i>IP</i> = High  | <i>J</i> = 1, <i>T</i> = 5  | 79.00%                 | 59.00%         | 40.00%          | -1.00%                 | 0.00%          | 1.00%           |
|                                    | <i>J</i> = 1, <i>T</i> = 10 | 30.50%                 | 14.00%         | 9.00%           | 0.00%                  | 1.00%          | 1.50%           |
|                                    | <i>J</i> = 3, <i>T</i> = 5  | 13.50%                 | 7.50%          | 4.50%           | -0.50%                 | 0.00%          | 0.50%           |
|                                    | <i>J</i> = 3, <i>T</i> = 10 | 2.00%                  | 2.50%          | 4.00%           | 1.00%                  | 0.50%          | 0.00%           |
|                                    | <i>J</i> = 5, <i>T</i> = 5  | 2.50%                  | 2.00%          | 2.50%           | 1.00%                  | 0.50%          | 0.50%           |
|                                    | <i>J</i> = 5, <i>T</i> = 10 | 1.50%                  | 2.50%          | 3.50%           | 1.50%                  | 0.00%          | 0.00%           |
| <i>TP</i> = High, <i>IP</i> = High | <i>J</i> = 1, <i>T</i> = 5  | 11.75%                 | 12.25%         | 7.25%           | -2.75%                 | -2.00%         | -0.50%          |
|                                    | <i>J</i> = 1, <i>T</i> = 10 | 5.25%                  | 1.25%          | -1.75%          | -2.50%                 | -1.00%         | 0.00%           |
|                                    | <i>J</i> = 3, <i>T</i> = 5  | 3.50%                  | 1.75%          | -0.25%          | -0.25%                 | 0.25%          | 0.50%           |
|                                    | <i>J</i> = 3, <i>T</i> = 10 | 0.75%                  | -2.00%         | -1.50%          | -0.25%                 | -0.25%         | 0.25%           |
|                                    | <i>J</i> = 5, <i>T</i> = 5  | -0.50%                 | -0.50%         | 0.75%           | 0.25%                  | 0.00%          | 0.25%           |
|                                    | <i>J</i> = 5, <i>T</i> = 10 | -1.00%                 | 0.00%          | 1.25%           | 0.50%                  | 0.25%          | 0.25%           |

Table S3.

Efficiency in the estimation of the transition probability across manipulated design facets.

|                                    |                             | <u><i>MQ</i> = Low</u> |                |                 | <u><i>MQ</i> = Med</u> |                |                 |
|------------------------------------|-----------------------------|------------------------|----------------|-----------------|------------------------|----------------|-----------------|
|                                    |                             | <i>N</i> = 200         | <i>N</i> = 400 | <i>N</i> = 1000 | <i>N</i> = 200         | <i>N</i> = 400 | <i>N</i> = 1000 |
| <i>TP</i> = Low, <i>IP</i> = Low   | <i>J</i> = 1, <i>T</i> = 5  | .192                   | .146           | .089            | .045                   | .031           | .020            |
|                                    | <i>J</i> = 1, <i>T</i> = 10 | .113                   | .069           | .040            | .024                   | .017           | .011            |
|                                    | <i>J</i> = 3, <i>T</i> = 5  | .096                   | .061           | .037            | .024                   | .016           | .011            |
|                                    | <i>J</i> = 3, <i>T</i> = 10 | .043                   | .029           | .019            | .017                   | .011           | .007            |
|                                    | <i>J</i> = 5, <i>T</i> = 5  | .059                   | .039           | .023            | .020                   | .015           | .010            |
|                                    | <i>J</i> = 5, <i>T</i> = 10 | .030                   | .020           | .013            | .016                   | .011           | .007            |
| <i>TP</i> = High, <i>IP</i> = Low  | <i>J</i> = 1, <i>T</i> = 5  | .181                   | .136           | .087            | .060                   | .046           | .029            |
|                                    | <i>J</i> = 1, <i>T</i> = 10 | .141                   | .104           | .064            | .043                   | .031           | .021            |
|                                    | <i>J</i> = 3, <i>T</i> = 5  | .113                   | .075           | .047            | .033                   | .024           | .015            |
|                                    | <i>J</i> = 3, <i>T</i> = 10 | .076                   | .052           | .034            | .029                   | .020           | .013            |
|                                    | <i>J</i> = 5, <i>T</i> = 5  | .074                   | .055           | .034            | .028                   | .021           | .013            |
|                                    | <i>J</i> = 5, <i>T</i> = 10 | .055                   | .037           | .023            | .026                   | .020           | .012            |
| <i>TP</i> = Low, <i>IP</i> = High  | <i>J</i> = 1, <i>T</i> = 5  | .185                   | .152           | .100            | .048                   | .033           | .022            |
|                                    | <i>J</i> = 1, <i>T</i> = 10 | .141                   | .088           | .047            | .029                   | .020           | .013            |
|                                    | <i>J</i> = 3, <i>T</i> = 5  | .115                   | .062           | .039            | .028                   | .020           | .012            |
|                                    | <i>J</i> = 3, <i>T</i> = 10 | .051                   | .035           | .022            | .020                   | .013           | .009            |
|                                    | <i>J</i> = 5, <i>T</i> = 5  | .060                   | .043           | .026            | .024                   | .018           | .011            |
|                                    | <i>J</i> = 5, <i>T</i> = 10 | .033                   | .024           | .016            | .019                   | .014           | .008            |
| <i>TP</i> = High, <i>IP</i> = High | <i>J</i> = 1, <i>T</i> = 5  | .188                   | .153           | .104            | .066                   | .049           | .035            |
|                                    | <i>J</i> = 1, <i>T</i> = 10 | .160                   | .119           | .079            | .052                   | .037           | .023            |
|                                    | <i>J</i> = 3, <i>T</i> = 5  | .126                   | .091           | .055            | .038                   | .027           | .018            |
|                                    | <i>J</i> = 3, <i>T</i> = 10 | .100                   | .063           | .039            | .033                   | .023           | .014            |
|                                    | <i>J</i> = 5, <i>T</i> = 5  | .090                   | .062           | .041            | .035                   | .024           | .015            |
|                                    | <i>J</i> = 5, <i>T</i> = 10 | .069                   | .046           | .029            | .030                   | .021           | .014            |

Table S4.

Raw bias in the estimation of the conditional probability of a correct response for a *Master*.

|                                    |                             | <u><i>MQ</i> = Low</u> |                |                 | <u><i>MQ</i> = Med</u> |                |                 |
|------------------------------------|-----------------------------|------------------------|----------------|-----------------|------------------------|----------------|-----------------|
|                                    |                             | <i>N</i> = 200         | <i>N</i> = 400 | <i>N</i> = 1000 | <i>N</i> = 200         | <i>N</i> = 400 | <i>N</i> = 1000 |
| <i>TP</i> = Low, <i>IP</i> = Low   | <i>J</i> = 1, <i>T</i> = 5  | -.027                  | -.028          | -.033           | -.008                  | -.002          | -.001           |
|                                    | <i>J</i> = 1, <i>T</i> = 10 | -.003                  | -.004          | .000            | -.001                  | .001           | .002            |
|                                    | <i>J</i> = 3, <i>T</i> = 5  | -.011                  | -.009          | -.005           | -.003                  | -.002          | .000            |
|                                    | <i>J</i> = 3, <i>T</i> = 10 | .000                   | .000           | .003            | .000                   | .000           | .000            |
|                                    | <i>J</i> = 5, <i>T</i> = 5  | -.004                  | -.003          | .000            | -.004                  | -.002          | .000            |
|                                    | <i>J</i> = 5, <i>T</i> = 10 | .000                   | .001           | .002            | -.001                  | -.001          | .000            |
| <i>TP</i> = High, <i>IP</i> = Low  | <i>J</i> = 1, <i>T</i> = 5  | .001                   | -.002          | -.004           | .001                   | .000           | .002            |
|                                    | <i>J</i> = 1, <i>T</i> = 10 | .001                   | .002           | .003            | .002                   | .002           | .003            |
|                                    | <i>J</i> = 3, <i>T</i> = 5  | -.002                  | -.001          | .002            | -.002                  | .000           | .000            |
|                                    | <i>J</i> = 3, <i>T</i> = 10 | .002                   | .001           | .004            | -.001                  | .000           | .000            |
|                                    | <i>J</i> = 5, <i>T</i> = 5  | .000                   | .000           | .002            | -.002                  | -.001          | .000            |
|                                    | <i>J</i> = 5, <i>T</i> = 10 | .001                   | .002           | .002            | -.001                  | .000           | .000            |
| <i>TP</i> = Low, <i>IP</i> = High  | <i>J</i> = 1, <i>T</i> = 5  | -.014                  | -.015          | -.017           | .000                   | .001           | .001            |
|                                    | <i>J</i> = 1, <i>T</i> = 10 | -.001                  | .000           | .001            | .001                   | .002           | .002            |
|                                    | <i>J</i> = 3, <i>T</i> = 5  | -.002                  | -.003          | -.001           | -.002                  | -.001          | .000            |
|                                    | <i>J</i> = 3, <i>T</i> = 10 | .002                   | .001           | .003            | -.001                  | .000           | .000            |
|                                    | <i>J</i> = 5, <i>T</i> = 5  | .000                   | .000           | .001            | -.002                  | .000           | .000            |
|                                    | <i>J</i> = 5, <i>T</i> = 10 | .000                   | .002           | .002            | -.001                  | -.001          | .000            |
| <i>TP</i> = High, <i>IP</i> = High | <i>J</i> = 1, <i>T</i> = 5  | .006                   | .001           | .000            | .005                   | .004           | .003            |
|                                    | <i>J</i> = 1, <i>T</i> = 10 | .003                   | .003           | .004            | .002                   | .003           | .003            |
|                                    | <i>J</i> = 3, <i>T</i> = 5  | .001                   | .001           | .003            | .000                   | -.001          | .001            |
|                                    | <i>J</i> = 3, <i>T</i> = 10 | .002                   | .003           | .005            | .000                   | .001           | .000            |
|                                    | <i>J</i> = 5, <i>T</i> = 5  | .003                   | .001           | .002            | -.001                  | .000           | .000            |
|                                    | <i>J</i> = 5, <i>T</i> = 10 | .002                   | .003           | .003            | -.001                  | .000           | .000            |

Table S5.

Relative bias in the estimation of the conditional probability of a correct response for a *Master*.

|                                    |                             | <u><i>MQ</i> = Low</u> |                |                 | <u><i>MQ</i> = Med</u> |                |                 |
|------------------------------------|-----------------------------|------------------------|----------------|-----------------|------------------------|----------------|-----------------|
|                                    |                             | <i>N</i> = 200         | <i>N</i> = 400 | <i>N</i> = 1000 | <i>N</i> = 200         | <i>N</i> = 400 | <i>N</i> = 1000 |
| <i>TP</i> = Low, <i>IP</i> = Low   | <i>J</i> = 1, <i>T</i> = 5  | -4.50%                 | -4.67%         | -5.50%          | -1.07%                 | -0.27%         | -0.13%          |
|                                    | <i>J</i> = 1, <i>T</i> = 10 | -0.50%                 | -0.67%         | 0.00%           | -0.13%                 | 0.13%          | 0.27%           |
|                                    | <i>J</i> = 3, <i>T</i> = 5  | -1.83%                 | -1.50%         | -0.83%          | -0.40%                 | -0.27%         | 0.00%           |
|                                    | <i>J</i> = 3, <i>T</i> = 10 | 0.00%                  | 0.00%          | 0.50%           | 0.00%                  | 0.00%          | 0.00%           |
|                                    | <i>J</i> = 5, <i>T</i> = 5  | -0.67%                 | -0.50%         | 0.00%           | -0.53%                 | -0.27%         | 0.00%           |
|                                    | <i>J</i> = 5, <i>T</i> = 10 | 0.00%                  | 0.17%          | 0.33%           | -0.13%                 | -0.13%         | 0.00%           |
| <i>TP</i> = High, <i>IP</i> = Low  | <i>J</i> = 1, <i>T</i> = 5  | 0.17%                  | -0.33%         | -0.67%          | 0.13%                  | 0.00%          | 0.27%           |
|                                    | <i>J</i> = 1, <i>T</i> = 10 | 0.17%                  | 0.33%          | 0.50%           | 0.27%                  | 0.27%          | 0.40%           |
|                                    | <i>J</i> = 3, <i>T</i> = 5  | -0.33%                 | -0.17%         | 0.33%           | -0.27%                 | 0.00%          | 0.00%           |
|                                    | <i>J</i> = 3, <i>T</i> = 10 | 0.33%                  | 0.17%          | 0.67%           | -0.13%                 | 0.00%          | 0.00%           |
|                                    | <i>J</i> = 5, <i>T</i> = 5  | 0.00%                  | 0.00%          | 0.33%           | -0.27%                 | -0.13%         | 0.00%           |
|                                    | <i>J</i> = 5, <i>T</i> = 10 | 0.17%                  | 0.33%          | 0.33%           | -0.13%                 | 0.00%          | 0.00%           |
| <i>TP</i> = Low, <i>IP</i> = High  | <i>J</i> = 1, <i>T</i> = 5  | -2.33%                 | -2.50%         | -2.83%          | 0.00%                  | 0.13%          | 0.13%           |
|                                    | <i>J</i> = 1, <i>T</i> = 10 | -0.17%                 | 0.00%          | 0.17%           | 0.13%                  | 0.27%          | 0.27%           |
|                                    | <i>J</i> = 3, <i>T</i> = 5  | -0.33%                 | -0.50%         | -0.17%          | -0.27%                 | -0.13%         | 0.00%           |
|                                    | <i>J</i> = 3, <i>T</i> = 10 | 0.33%                  | 0.17%          | 0.50%           | -0.13%                 | 0.00%          | 0.00%           |
|                                    | <i>J</i> = 5, <i>T</i> = 5  | 0.00%                  | 0.00%          | 0.17%           | -0.27%                 | 0.00%          | 0.00%           |
|                                    | <i>J</i> = 5, <i>T</i> = 10 | 0.00%                  | 0.33%          | 0.33%           | -0.13%                 | -0.13%         | 0.00%           |
| <i>TP</i> = High, <i>IP</i> = High | <i>J</i> = 1, <i>T</i> = 5  | 1.00%                  | 0.17%          | 0.00%           | 0.67%                  | 0.53%          | 0.40%           |
|                                    | <i>J</i> = 1, <i>T</i> = 10 | 0.50%                  | 0.50%          | 0.67%           | 0.27%                  | 0.40%          | 0.40%           |
|                                    | <i>J</i> = 3, <i>T</i> = 5  | 0.17%                  | 0.17%          | 0.50%           | 0.00%                  | -0.13%         | 0.13%           |
|                                    | <i>J</i> = 3, <i>T</i> = 10 | 0.33%                  | 0.50%          | 0.83%           | 0.00%                  | 0.13%          | 0.00%           |
|                                    | <i>J</i> = 5, <i>T</i> = 5  | 0.50%                  | 0.17%          | 0.33%           | -0.13%                 | 0.00%          | 0.00%           |
|                                    | <i>J</i> = 5, <i>T</i> = 10 | 0.33%                  | 0.50%          | 0.50%           | -0.13%                 | 0.00%          | 0.00%           |

Table S6.

Efficiency in the estimation of the conditional probability of a correct response for a *Master*.

|                                    |                             | <u><i>MQ</i> = Low</u> |                |                 | <u><i>MQ</i> = Med</u> |                |                 |
|------------------------------------|-----------------------------|------------------------|----------------|-----------------|------------------------|----------------|-----------------|
|                                    |                             | <i>N</i> = 200         | <i>N</i> = 400 | <i>N</i> = 1000 | <i>N</i> = 200         | <i>N</i> = 400 | <i>N</i> = 1000 |
| <i>TP</i> = Low, <i>IP</i> = Low   | <i>J</i> = 1, <i>T</i> = 5  | .062                   | .053           | .029            | .043                   | .034           | .022            |
|                                    | <i>J</i> = 1, <i>T</i> = 10 | .030                   | .021           | .014            | .017                   | .013           | .008            |
|                                    | <i>J</i> = 3, <i>T</i> = 5  | .046                   | .034           | .021            | .023                   | .017           | .011            |
|                                    | <i>J</i> = 3, <i>T</i> = 10 | .019                   | .014           | .009            | .013                   | .009           | .006            |
|                                    | <i>J</i> = 5, <i>T</i> = 5  | .037                   | .026           | .016            | .022                   | .015           | .010            |
|                                    | <i>J</i> = 5, <i>T</i> = 10 | .017                   | .012           | .008            | .012                   | .009           | .006            |
| <i>TP</i> = High, <i>IP</i> = Low  | <i>J</i> = 1, <i>T</i> = 5  | .044                   | .034           | .019            | .031                   | .024           | .015            |
|                                    | <i>J</i> = 1, <i>T</i> = 10 | .020                   | .014           | .009            | .014                   | .011           | .007            |
|                                    | <i>J</i> = 3, <i>T</i> = 5  | .031                   | .021           | .014            | .021                   | .014           | .009            |
|                                    | <i>J</i> = 3, <i>T</i> = 10 | .015                   | .011           | .007            | .011                   | .008           | .005            |
|                                    | <i>J</i> = 5, <i>T</i> = 5  | .027                   | .018           | .012            | .018                   | .013           | .008            |
|                                    | <i>J</i> = 5, <i>T</i> = 10 | .014                   | .010           | .006            | .011                   | .008           | .005            |
| <i>TP</i> = Low, <i>IP</i> = High  | <i>J</i> = 1, <i>T</i> = 5  | .053                   | .046           | .028            | .034                   | .026           | .018            |
|                                    | <i>J</i> = 1, <i>T</i> = 10 | .029                   | .021           | .012            | .016                   | .012           | .007            |
|                                    | <i>J</i> = 3, <i>T</i> = 5  | .039                   | .027           | .018            | .021                   | .015           | .009            |
|                                    | <i>J</i> = 3, <i>T</i> = 10 | .018                   | .013           | .009            | .012                   | .008           | .005            |
|                                    | <i>J</i> = 5, <i>T</i> = 5  | .029                   | .022           | .014            | .018                   | .013           | .008            |
|                                    | <i>J</i> = 5, <i>T</i> = 10 | .016                   | .011           | .007            | .011                   | .008           | .005            |
| <i>TP</i> = High, <i>IP</i> = High | <i>J</i> = 1, <i>T</i> = 5  | .043                   | .032           | .018            | .027                   | .021           | .014            |
|                                    | <i>J</i> = 1, <i>T</i> = 10 | .019                   | .014           | .009            | .014                   | .010           | .006            |
|                                    | <i>J</i> = 3, <i>T</i> = 5  | .031                   | .021           | .013            | .019                   | .013           | .008            |
|                                    | <i>J</i> = 3, <i>T</i> = 10 | .015                   | .011           | .007            | .011                   | .008           | .005            |
|                                    | <i>J</i> = 5, <i>T</i> = 5  | .027                   | .018           | .012            | .018                   | .013           | .008            |
|                                    | <i>J</i> = 5, <i>T</i> = 10 | .014                   | .010           | .006            | .011                   | .008           | .005            |

Table S7.

Raw bias in the estimation of the conditional probability of a correct response for a *Non-master*.

|                                    |                             | <u><i>MQ</i> = Low</u> |                |                 | <u><i>MQ</i> = Med</u> |                |                 |
|------------------------------------|-----------------------------|------------------------|----------------|-----------------|------------------------|----------------|-----------------|
|                                    |                             | <i>N</i> = 200         | <i>N</i> = 400 | <i>N</i> = 1000 | <i>N</i> = 200         | <i>N</i> = 400 | <i>N</i> = 1000 |
| <i>TP</i> = Low, <i>IP</i> = Low   | <i>J</i> = 1, <i>T</i> = 5  | -.029                  | -.037          | -.044           | -.004                  | .000           | -.001           |
|                                    | <i>J</i> = 1, <i>T</i> = 10 | -.013                  | -.012          | -.006           | .007                   | .004           | -.001           |
|                                    | <i>J</i> = 3, <i>T</i> = 5  | -.012                  | -.009          | -.006           | .002                   | .001           | .000            |
|                                    | <i>J</i> = 3, <i>T</i> = 10 | .002                   | .000           | .000            | .003                   | .002           | .001            |
|                                    | <i>J</i> = 5, <i>T</i> = 5  | -.003                  | -.002          | -.001           | .002                   | .002           | .000            |
|                                    | <i>J</i> = 5, <i>T</i> = 10 | .001                   | .000           | .000            | .004                   | .002           | .000            |
| <i>TP</i> = High, <i>IP</i> = Low  | <i>J</i> = 1, <i>T</i> = 5  | -.021                  | -.024          | -.023           | .013                   | .007           | .002            |
|                                    | <i>J</i> = 1, <i>T</i> = 10 | .002                   | .001           | .005            | .030                   | .015           | .007            |
|                                    | <i>J</i> = 3, <i>T</i> = 5  | -.003                  | -.004          | .001            | .005                   | .003           | .001            |
|                                    | <i>J</i> = 3, <i>T</i> = 10 | .009                   | .007           | .011            | .009                   | .005           | .002            |
|                                    | <i>J</i> = 5, <i>T</i> = 5  | .001                   | .000           | .001            | .004                   | .001           | .001            |
|                                    | <i>J</i> = 5, <i>T</i> = 10 | .009                   | .005           | .005            | .008                   | .004           | .002            |
| <i>TP</i> = Low, <i>IP</i> = High  | <i>J</i> = 1, <i>T</i> = 5  | -.006                  | -.015          | -.027           | .007                   | .003           | -.001           |
|                                    | <i>J</i> = 1, <i>T</i> = 10 | .003                   | -.002          | -.004           | .011                   | .005           | .000            |
|                                    | <i>J</i> = 3, <i>T</i> = 5  | -.008                  | -.005          | -.004           | .004                   | .001           | .000            |
|                                    | <i>J</i> = 3, <i>T</i> = 10 | .006                   | .003           | .001            | .005                   | .003           | .001            |
|                                    | <i>J</i> = 5, <i>T</i> = 5  | .000                   | -.003          | -.001           | .003                   | .001           | .001            |
|                                    | <i>J</i> = 5, <i>T</i> = 10 | .004                   | .001           | .001            | .006                   | .003           | .001            |
| <i>TP</i> = High, <i>IP</i> = High | <i>J</i> = 1, <i>T</i> = 5  | .005                   | .001           | .000            | .031                   | .016           | .007            |
|                                    | <i>J</i> = 1, <i>T</i> = 10 | .025                   | .020           | .024            | .046                   | .023           | .010            |
|                                    | <i>J</i> = 3, <i>T</i> = 5  | .006                   | .005           | .005            | .009                   | .004           | .001            |
|                                    | <i>J</i> = 3, <i>T</i> = 10 | .019                   | .016           | .015            | .017                   | .008           | .003            |
|                                    | <i>J</i> = 5, <i>T</i> = 5  | .006                   | .004           | .003            | .006                   | .003           | .000            |
|                                    | <i>J</i> = 5, <i>T</i> = 10 | .013                   | .008           | .005            | .011                   | .006           | .003            |

Table S8.

Relative bias in the estimation of the conditional probability of a correct response for a *Non-master*.

|                                    |                             | <u><i>MQ</i> = Low</u> |                |                 | <u><i>MQ</i> = Med</u> |                |                 |
|------------------------------------|-----------------------------|------------------------|----------------|-----------------|------------------------|----------------|-----------------|
|                                    |                             | <i>N</i> = 200         | <i>N</i> = 400 | <i>N</i> = 1000 | <i>N</i> = 200         | <i>N</i> = 400 | <i>N</i> = 1000 |
| <i>TP</i> = Low, <i>IP</i> = Low   | <i>J</i> = 1, <i>T</i> = 5  | -7.25%                 | -9.25%         | -11.00%         | -1.60%                 | 0.00%          | -0.40%          |
|                                    | <i>J</i> = 1, <i>T</i> = 10 | -3.25%                 | -3.00%         | -1.50%          | 2.80%                  | 1.60%          | -0.40%          |
|                                    | <i>J</i> = 3, <i>T</i> = 5  | -3.00%                 | -2.25%         | -1.50%          | 0.80%                  | 0.40%          | 0.00%           |
|                                    | <i>J</i> = 3, <i>T</i> = 10 | 0.50%                  | 0.00%          | 0.00%           | 1.20%                  | 0.80%          | 0.40%           |
|                                    | <i>J</i> = 5, <i>T</i> = 5  | -0.75%                 | -0.50%         | -0.25%          | 0.80%                  | 0.80%          | 0.00%           |
|                                    | <i>J</i> = 5, <i>T</i> = 10 | 0.25%                  | 0.00%          | 0.00%           | 1.60%                  | 0.80%          | 0.00%           |
| <i>TP</i> = High, <i>IP</i> = Low  | <i>J</i> = 1, <i>T</i> = 5  | -5.25%                 | -6.00%         | -5.75%          | 5.20%                  | 2.80%          | 0.80%           |
|                                    | <i>J</i> = 1, <i>T</i> = 10 | 0.50%                  | 0.25%          | 1.25%           | 12.00%                 | 6.00%          | 2.80%           |
|                                    | <i>J</i> = 3, <i>T</i> = 5  | -0.75%                 | -1.00%         | 0.25%           | 2.00%                  | 1.20%          | 0.40%           |
|                                    | <i>J</i> = 3, <i>T</i> = 10 | 2.25%                  | 1.75%          | 2.75%           | 3.60%                  | 2.00%          | 0.80%           |
|                                    | <i>J</i> = 5, <i>T</i> = 5  | 0.25%                  | 0.00%          | 0.25%           | 1.60%                  | 0.40%          | 0.40%           |
|                                    | <i>J</i> = 5, <i>T</i> = 10 | 2.25%                  | 1.25%          | 1.25%           | 3.20%                  | 1.60%          | 0.80%           |
| <i>TP</i> = Low, <i>IP</i> = High  | <i>J</i> = 1, <i>T</i> = 5  | -1.50%                 | -3.75%         | -6.75%          | 2.80%                  | 1.20%          | -0.40%          |
|                                    | <i>J</i> = 1, <i>T</i> = 10 | 0.75%                  | -0.50%         | -1.00%          | 4.40%                  | 2.00%          | 0.00%           |
|                                    | <i>J</i> = 3, <i>T</i> = 5  | -2.00%                 | -1.25%         | -1.00%          | 1.60%                  | 0.40%          | 0.00%           |
|                                    | <i>J</i> = 3, <i>T</i> = 10 | 1.50%                  | 0.75%          | 0.25%           | 2.00%                  | 1.20%          | 0.40%           |
|                                    | <i>J</i> = 5, <i>T</i> = 5  | 0.00%                  | -0.75%         | -0.25%          | 1.20%                  | 0.40%          | 0.40%           |
|                                    | <i>J</i> = 5, <i>T</i> = 10 | 1.00%                  | 0.25%          | 0.25%           | 2.40%                  | 1.20%          | 0.40%           |
| <i>TP</i> = High, <i>IP</i> = High | <i>J</i> = 1, <i>T</i> = 5  | 1.25%                  | 0.25%          | 0.00%           | 12.40%                 | 6.40%          | 2.80%           |
|                                    | <i>J</i> = 1, <i>T</i> = 10 | 6.25%                  | 5.00%          | 6.00%           | 18.40%                 | 9.20%          | 4.00%           |
|                                    | <i>J</i> = 3, <i>T</i> = 5  | 1.50%                  | 1.25%          | 1.25%           | 3.60%                  | 1.60%          | 0.40%           |
|                                    | <i>J</i> = 3, <i>T</i> = 10 | 4.75%                  | 4.00%          | 3.75%           | 6.80%                  | 3.20%          | 1.20%           |
|                                    | <i>J</i> = 5, <i>T</i> = 5  | 1.50%                  | 1.00%          | 0.75%           | 2.40%                  | 1.20%          | 0.00%           |
|                                    | <i>J</i> = 5, <i>T</i> = 10 | 3.25%                  | 2.00%          | 1.25%           | 4.40%                  | 2.40%          | 1.20%           |

Table S9.

Efficiency in the estimation of the conditional probability of a correct response for a *Non-master*.

|                                    |                             | <u><i>MQ</i> = Low</u> |                |                 | <u><i>MQ</i> = Med</u> |                |                 |
|------------------------------------|-----------------------------|------------------------|----------------|-----------------|------------------------|----------------|-----------------|
|                                    |                             | <i>N</i> = 200         | <i>N</i> = 400 | <i>N</i> = 1000 | <i>N</i> = 200         | <i>N</i> = 400 | <i>N</i> = 1000 |
| <i>TP</i> = Low, <i>IP</i> = Low   | <i>J</i> = 1, <i>T</i> = 5  | .052                   | .046           | .033            | .040                   | .030           | .020            |
|                                    | <i>J</i> = 1, <i>T</i> = 10 | .039                   | .033           | .024            | .029                   | .021           | .014            |
|                                    | <i>J</i> = 3, <i>T</i> = 5  | .043                   | .031           | .019            | .022                   | .015           | .010            |
|                                    | <i>J</i> = 3, <i>T</i> = 10 | .029                   | .022           | .014            | .018                   | .013           | .008            |
|                                    | <i>J</i> = 5, <i>T</i> = 5  | .034                   | .023           | .015            | .020                   | .014           | .009            |
|                                    | <i>J</i> = 5, <i>T</i> = 10 | .026                   | .019           | .012            | .018                   | .012           | .008            |
| <i>TP</i> = High, <i>IP</i> = Low  | <i>J</i> = 1, <i>T</i> = 5  | .050                   | .042           | .031            | .051                   | .038           | .027            |
|                                    | <i>J</i> = 1, <i>T</i> = 10 | .038                   | .034           | .029            | .044                   | .036           | .025            |
|                                    | <i>J</i> = 3, <i>T</i> = 5  | .046                   | .034           | .022            | .028                   | .020           | .012            |
|                                    | <i>J</i> = 3, <i>T</i> = 10 | .036                   | .031           | .021            | .026                   | .019           | .012            |
|                                    | <i>J</i> = 5, <i>T</i> = 5  | .038                   | .029           | .018            | .025                   | .017           | .011            |
|                                    | <i>J</i> = 5, <i>T</i> = 10 | .035                   | .025           | .016            | .023                   | .017           | .011            |
| <i>TP</i> = Low, <i>IP</i> = High  | <i>J</i> = 1, <i>T</i> = 5  | .063                   | .055           | .041            | .046                   | .034           | .026            |
|                                    | <i>J</i> = 1, <i>T</i> = 10 | .047                   | .042           | .032            | .035                   | .026           | .016            |
|                                    | <i>J</i> = 3, <i>T</i> = 5  | .053                   | .037           | .024            | .026                   | .018           | .012            |
|                                    | <i>J</i> = 3, <i>T</i> = 10 | .038                   | .027           | .018            | .021                   | .015           | .009            |
|                                    | <i>J</i> = 5, <i>T</i> = 5  | .040                   | .029           | .018            | .024                   | .017           | .011            |
|                                    | <i>J</i> = 5, <i>T</i> = 10 | .031                   | .022           | .014            | .020                   | .014           | .009            |
| <i>TP</i> = High, <i>IP</i> = High | <i>J</i> = 1, <i>T</i> = 5  | .056                   | .047           | .035            | .059                   | .052           | .037            |
|                                    | <i>J</i> = 1, <i>T</i> = 10 | .041                   | .040           | .037            | .054                   | .043           | .030            |
|                                    | <i>J</i> = 3, <i>T</i> = 5  | .056                   | .042           | .029            | .034                   | .025           | .016            |
|                                    | <i>J</i> = 3, <i>T</i> = 10 | .050                   | .037           | .028            | .031                   | .023           | .015            |
|                                    | <i>J</i> = 5, <i>T</i> = 5  | .051                   | .037           | .025            | .029                   | .021           | .013            |
|                                    | <i>J</i> = 5, <i>T</i> = 10 | .041                   | .032           | .021            | .027                   | .020           | .012            |

Table S10.

Classification accuracy (validation), as a percentage across manipulated design facets.

|                                    |                             | <u><i>MQ</i> = Low</u> |                |                 | <u><i>MQ</i> = Med</u> |                |                 |
|------------------------------------|-----------------------------|------------------------|----------------|-----------------|------------------------|----------------|-----------------|
|                                    |                             | <i>N</i> = 200         | <i>N</i> = 400 | <i>N</i> = 1000 | <i>N</i> = 200         | <i>N</i> = 400 | <i>N</i> = 1000 |
| <i>TP</i> = Low, <i>IP</i> = Low   | <i>J</i> = 1, <i>T</i> = 5  | 66.77                  | 66.67          | 67.35           | 80.94                  | 81.42          | 81.84           |
|                                    | <i>J</i> = 1, <i>T</i> = 10 | 88.06                  | 88.84          | 89.21           | 93.19                  | 93.20          | 93.25           |
|                                    | <i>J</i> = 3, <i>T</i> = 5  | 70.76                  | 72.23          | 73.47           | 91.19                  | 91.42          | 91.46           |
|                                    | <i>J</i> = 3, <i>T</i> = 10 | 89.91                  | 90.20          | 90.33           | 97.13                  | 97.11          | 97.09           |
|                                    | <i>J</i> = 5, <i>T</i> = 5  | 76.17                  | 77.26          | 77.93           | 95.08                  | 95.18          | 95.12           |
|                                    | <i>J</i> = 5, <i>T</i> = 10 | 91.59                  | 91.63          | 91.84           | 98.40                  | 98.37          | 98.39           |
| <i>TP</i> = High, <i>IP</i> = Low  | <i>J</i> = 1, <i>T</i> = 5  | 87.58                  | 88.39          | 89.48           | 91.09                  | 91.22          | 91.38           |
|                                    | <i>J</i> = 1, <i>T</i> = 10 | 99.00                  | 99.18          | 99.20           | 99.22                  | 99.27          | 99.26           |
|                                    | <i>J</i> = 3, <i>T</i> = 5  | 88.86                  | 89.41          | 89.73           | 95.63                  | 95.64          | 95.65           |
|                                    | <i>J</i> = 3, <i>T</i> = 10 | 99.15                  | 99.19          | 99.19           | 99.64                  | 99.63          | 99.65           |
|                                    | <i>J</i> = 5, <i>T</i> = 5  | 89.92                  | 90.18          | 90.31           | 97.48                  | 97.49          | 97.52           |
|                                    | <i>J</i> = 5, <i>T</i> = 10 | 99.17                  | 99.20          | 99.21           | 99.80                  | 99.81          | 99.80           |
| <i>TP</i> = Low, <i>IP</i> = High  | <i>J</i> = 1, <i>T</i> = 5  | 73.75                  | 73.97          | 75.06           | 84.66                  | 85.14          | 85.38           |
|                                    | <i>J</i> = 1, <i>T</i> = 10 | 90.93                  | 91.30          | 91.84           | 94.59                  | 94.81          | 94.91           |
|                                    | <i>J</i> = 3, <i>T</i> = 5  | 76.57                  | 78.02          | 78.84           | 93.20                  | 93.34          | 93.38           |
|                                    | <i>J</i> = 3, <i>T</i> = 10 | 92.19                  | 92.48          | 92.65           | 97.82                  | 97.83          | 97.83           |
|                                    | <i>J</i> = 5, <i>T</i> = 5  | 80.92                  | 81.82          | 82.35           | 96.22                  | 96.34          | 96.33           |
|                                    | <i>J</i> = 5, <i>T</i> = 10 | 93.47                  | 93.68          | 93.73           | 98.83                  | 98.81          | 98.79           |
| <i>TP</i> = High, <i>IP</i> = High | <i>J</i> = 1, <i>T</i> = 5  | 89.70                  | 91.12          | 92.07           | 93.02                  | 93.19          | 93.35           |
|                                    | <i>J</i> = 1, <i>T</i> = 10 | 99.20                  | 99.37          | 99.39           | 99.43                  | 99.44          | 99.45           |
|                                    | <i>J</i> = 3, <i>T</i> = 5  | 91.18                  | 91.80          | 92.18           | 96.61                  | 96.68          | 96.70           |
|                                    | <i>J</i> = 3, <i>T</i> = 10 | 99.33                  | 99.37          | 99.40           | 99.73                  | 99.72          | 99.73           |
|                                    | <i>J</i> = 5, <i>T</i> = 5  | 91.96                  | 92.50          | 92.67           | 98.14                  | 98.12          | 98.14           |
|                                    | <i>J</i> = 5, <i>T</i> = 10 | 99.39                  | 99.41          | 99.41           | 99.85                  | 99.86          | 99.86           |

Note. : ≤ 70%, : 70% - 79.99%, : 80% - 89.99%, None: ≥ 90%.

Table S11.

Relative estimation bias by sample size and measurement quality for the L-DCM measurement model parameters.

|                           | <i>MQ</i> = Low |                |                  | <i>MQ</i> = Medium |                |                  | <i>MQ</i> = High |                |                  |
|---------------------------|-----------------|----------------|------------------|--------------------|----------------|------------------|------------------|----------------|------------------|
|                           | <i>N</i> = 200  | <i>N</i> = 400 | <i>N</i> = 1,000 | <i>N</i> = 200     | <i>N</i> = 400 | <i>N</i> = 1,000 | <i>N</i> = 200   | <i>N</i> = 400 | <i>N</i> = 1,000 |
| $P(X_1=1 \theta_1=NM)$    | 2.00%           | -1.25%         | -0.50%           | -0.80%             | 3.60%          | 2.40%            | 7.00%            | 1.00%          | 0.00%            |
| $P(X_1=1 \theta_1=M)$     | 4.83%           | 5.33%          | 3.50%            | 1.47%              | 1.33%          | 0.13%            | 0.78%            | 0.33%          | 0.56%            |
| $P(X_5=1 \theta_2=NM)$    | -5.25%          | -5.25%         | -0.75%           | 1.60%              | 0.00%          | 1.60%            | 11.00%           | 3.00%          | 2.00%            |
| $P(X_5=1 \theta_2=M)$     | 3.67%           | 1.33%          | 2.17%            | -0.80%             | 0.13%          | -0.13%           | -0.44%           | -0.44%         | 0.00%            |
| $P(X_{11}=1 \theta_3=NM)$ | -2.50%          | -4.75%         | -3.25%           | 2.00%              | 0.80%          | 0.00%            | 5.00%            | 0.00%          | 4.00%            |
| $P(X_{11}=1 \theta_3=M)$  | 4.83%           | 2.83%          | 2.67%            | 0.80%              | 2.40%          | -0.80%           | 0.00%            | 0.56%          | -0.11%           |
| $P(X_{16}=1 \theta_4=NM)$ | -3.00%          | -4.25%         | 2.00%            | -1.60%             | -2.40%         | -0.40%           | -3.00%           | 7.00%          | 0.00%            |
| $P(X_{16}=1 \theta_4=M)$  | 3.67%           | 5.17%          | 0.00%            | -0.13%             | -0.40%         | 0.00%            | 0.00%            | -0.56%         | -0.33%           |
